# Supplementary material for: Solid-Phase Synthesis of Red Fluorescent Carbon Dots for the Dual-Mode Detection of Hexavalent Chromium and Cell Imaging
Source: MDPI journal article supplement (doi:10.3390/bios12060432), 2022-06-20
Supplement: s1 [file s1]

# Solid-phase Synthesis of Red Fluorescent Carbon Dots for the Dual-mode Detection of Hexavalent Chromium and Cell Imaging

Jinshuang Hu <sup>1</sup>, Xin Wang <sup>1</sup>, Hua Wei <sup>1</sup>, Lei Zhao <sup>2,\*</sup>, Boxuan Yao <sup>1</sup>, Caiyun Zhang <sup>1</sup>, Jiarui Zhou <sup>1</sup>, Jian Liu <sup>3</sup>, Shenghong Yang <sup>1,\*</sup>

<sup>1</sup> Shandong Provincial Key Laboratory of Molecular Engineering, School of Chemistry and Chemical Engineering, Qilu University of Technology (Shandong Academy of Sciences), Jinan, 250353, P.R. China.

<sup>2</sup> Key Laboratory of Biotechnology and Bioengineering of State Ethnic Affairs Commission, Biomedical Research Center, Northwest Minzu University, Lanzhou, 730030, China.

<sup>3</sup> Institute of Advanced Materials, Jiangxi Normal University, Nanchang, 330022, China.

\* yangsh@qlu.edu.cn (S.H. Yang), zhaolei@xbmu.edu.cn (L. Zhao)

## Figures

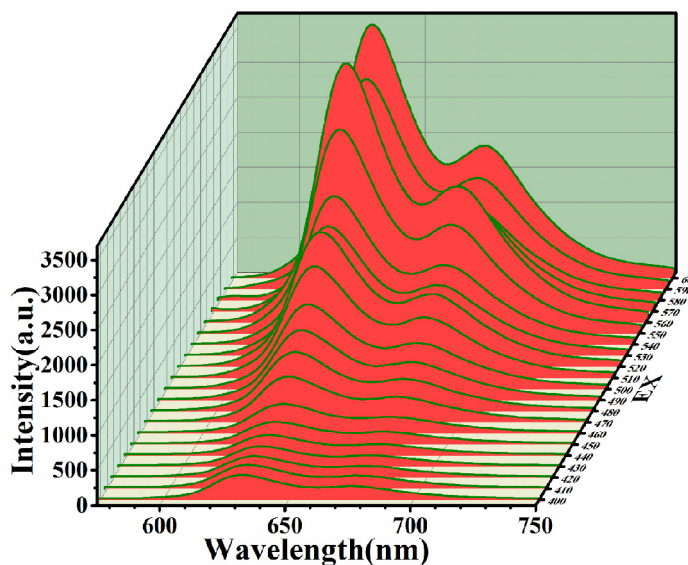

**Figure S1.** The PL spectra of R-CDs with excitation wavelength from 400 to 600 nm.

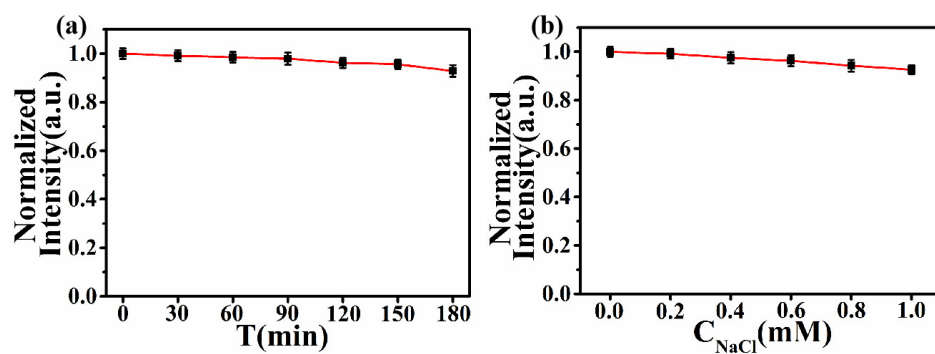

**Figure S2.** Influence of light illumination (a) and ion strength (b) on the PL intensity of R-CDs.

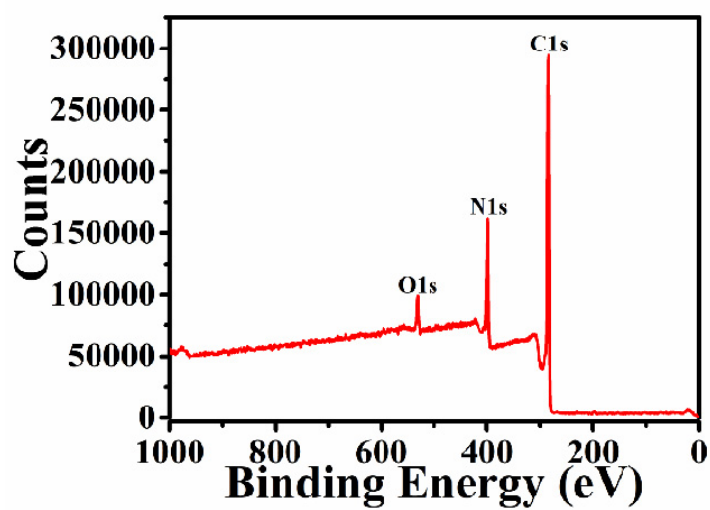

**Figure S3.** XPS survey spectra of synthesized R-CDs.

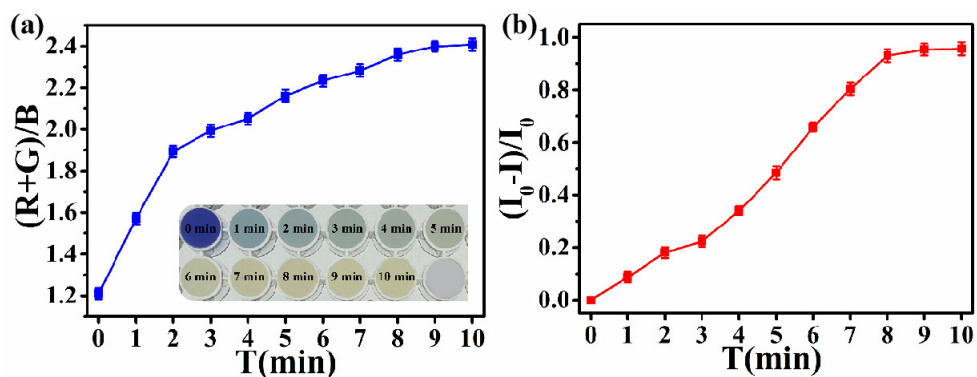

**Figure S4.** The R ,G ,B values (a) and fluorescent signal (b) response time of R-CDs to Cr(VI), Inset: pictures of 96-well plates with different response times of Cr(VI).

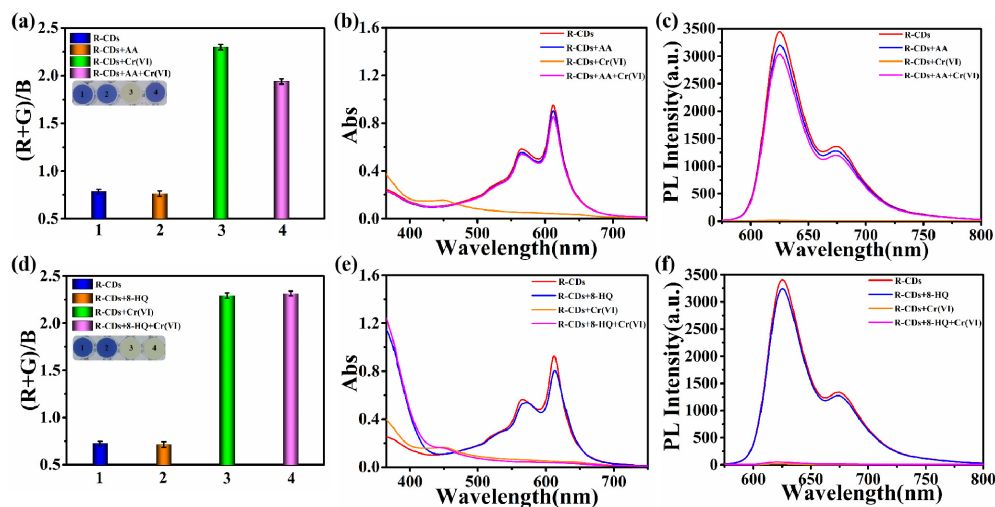

**Figure S5.** The influence of ascorbic acid (AA) on the scanometric, absorption and fluorescent sensing of Cr(VI), the influence of 8-hydroxyquinoline (8-HQ) on the scanometric, absorption and fluorescent sensing of Cr(VI).

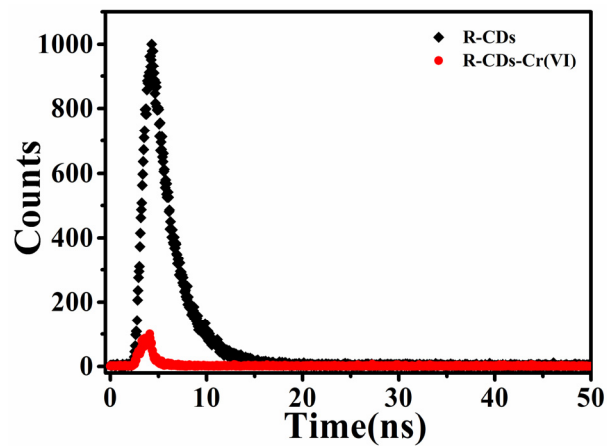

**Figure S6.** Fluorescence lifetime of R-CDs and R-CDs-Cr(VI).

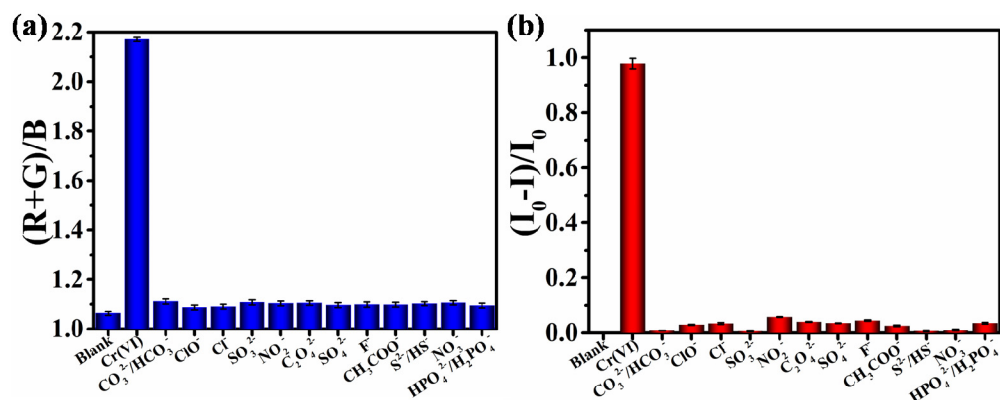

**Figure S7.** The change of  $(R+G)/B$  (a) values of R-CDs for various anions and the response of luminescence intensity  $(I_0-I)/I_0$  (b). The colorimetric and fluorescence mode concentrations of all heavy metal anions are 50  $\mu\text{M}$ .

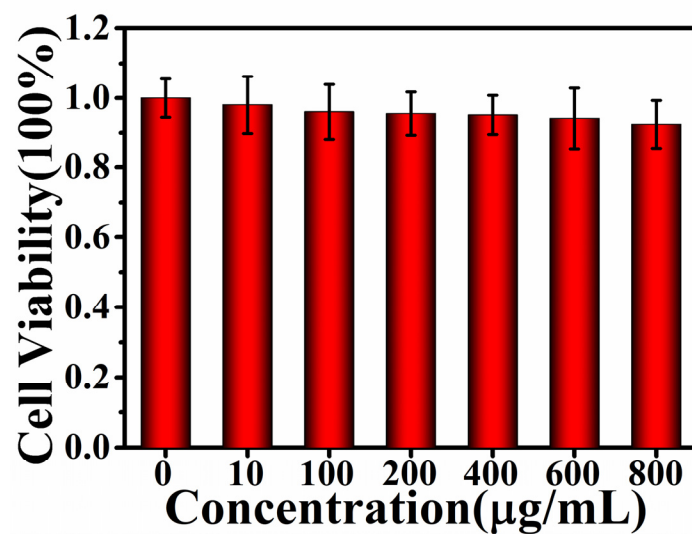

**Figure S8.** MTT test results of R-CDs.

**Table S1.** Values (%) of each peak fitted.

| Element | Peak Fitted | Value (%) |
|---------|-------------|-----------|
| C       | C=O         | 34.2      |
|         | C-O/C-N     | 33.5      |
|         | C-C/C=C     | 32.3      |
| N       | Pyrrole N   | 5.3       |
|         | Amine N     | 53.4      |
|         | Pyridine N  | 41.3      |
| O       | C=O         | 34.2      |
|         | C-O         | 65.8      |

**Table S2.** Comparison of different probes for detection of Cr(VI).

| Sensor                                                | Fluorometry ( $\mu\text{M}$ ) | Colorimetry ( $\mu\text{M}$ ) | Ref.             |
|-------------------------------------------------------|-------------------------------|-------------------------------|------------------|
| N-CQDs                                                | 2.1                           | -                             | 1                |
| NH <sub>2</sub> -CuMOFs                               | 0.018                         | -                             | 2                |
| N, B-CQDs                                             | 0.077                         | -                             | 3                |
| CP-CDs                                                | 0.015                         | -                             | 4                |
| CDs                                                   | 0.19                          | -                             | 5                |
| PEG                                                   | 0.75                          | -                             | 6                |
| CNDs                                                  | 0.058                         | -                             | 7                |
| NH <sub>2</sub> -mSiO <sub>2</sub> @CDs               | 0.005                         | -                             | 8                |
| CDs@Eu-MOFs                                           | 0.21                          | -                             | 9                |
| USTS-7                                                | 0.21                          | -                             | 10               |
| BNCDs                                                 | 0.41                          | -                             | 11               |
| CMC-SQDs                                              | 0.024                         | -                             | 12               |
| N-CDs                                                 | 0.023                         | -                             | 13               |
| N-CDs-W-THF                                           | -                             | 0.3                           | 14               |
| Au NDC@Ag NRs                                         | -                             | 1.69                          | 15               |
| CoFe <sub>2</sub> O <sub>4</sub> /H <sub>2</sub> PPOP | -                             | 0.026                         | 16               |
| CDs                                                   | 0.26                          | 0.062                         | 17               |
| GQDs                                                  | 0.43                          | 0.10                          | 18               |
| B/Y-CQDs                                              | 0.04                          | 0.55                          | 19               |
| CDs                                                   | 0.14                          | 0.041                         | 20               |
| <b>R-CDs</b>                                          | <b>0.009</b>                  | <b>0.098</b>                  | <b>This work</b> |

**Table S3.** The fluorescence method is used to detect Cr(VI) in actual water samples.

| Sample       | Spiked ( $\mu\text{M}$ ) | Found ( $\mu\text{M}$ ) | Recovery (%) | RSD (%) |
|--------------|--------------------------|-------------------------|--------------|---------|
| Tap water    | 0.1                      | 0.097                   | 97.3         | 1.2     |
|              | 0.5                      | 0.48                    | 96.6         | 4.1     |
|              | 1.5                      | 1.53                    | 102.3        | 1.6     |
| Rain water   | 0.1                      | 0.106                   | 106.0        | 1.2     |
|              | 0.5                      | 0.49                    | 98.6         | 2.5     |
|              | 1.5                      | 1.47                    | 97.9         | 3.4     |
| Pearl Spring | 0.1                      | 0.103                   | 103.5        | 1.8     |
|              | 0.5                      | 0.53                    | 106.3        | 2.9     |
|              | 1.5                      | 1.39                    | 92.6         | 3.1     |
| Daming Lake  | 0.1                      | 0.098                   | 98.4         | 4.3     |
|              | 0.5                      | 0.52                    | 104.6        | 2.4     |
|              | 1.5                      | 1.532                   | 102.1        | 1.7     |
